# Supplementary material
Source: PubMed Central journal article supplement (PMC8420329)
Supplement: IJCP-75-0-s002.pdf [file IJCP-75-0-s002.pdf]

# Current Pharmacological Practices in Severe COVID-19

We aim to collect data on current pharmacological practices in the management of adult with severe coronavirus disease 2019 (COVID-19) in India.

The ongoing pandemic of COVID-19 has proven to be the greatest medical emergency of recent times. The evidence on the therapeutics has evolved significantly in the last few months after initial use of re-purposed drugs. This cross-sectional survey intend to collect pharmacological practices of physicians involved in management of severe COVID-19 in India.

The study protocol is registered with [clinicaltrials.gov](https://clinicaltrials.gov) (Identifier: NCT04691921)

The survey questionnaire is divided into three sections: 1. Antiviral agents 2.Immunomodulators 3. Adjuvant therapies. There is a comment section for your feedback or suggestions along with a few questions. The survey questionnaire will take approximately 7-10 minutes to complete.

Please contact our team for any query at: [covid19severe@gmail.com](mailto:covid19severe@gmail.com)

Dr Bharat Jagiasi, Dr Gunjan Chanchalanai, Dr Prashant Nasa

The survey participation is only for clinicians involved in the management of patients with severe COVID-19. By providing your e-mail below, you consent to participation in this survey.

WE SINCERELY THANK YOU FOR YOUR EFFORTS!

\* Required

1. Email address \*

---

### Acronyms used in the survey

COVID-19: Coronavirus disease 2019

ARDS: Acute respiratory distress syndrome

PEEP: positive end expiratory pressure

### Demographics

Only basic information will be collected to understand any relation between demographics and treatment

2. What is the type of institution you are currently working? \*

*Mark only one oval.*

- Public (Government) Hospital
- Private Hospital
- Medical College-Hospital

3. In which clinical specialty are you currently working? \*

*Mark only one oval.*

- Internal Medicine
- Anesthesiology
- Pulmonary Medicine
- Infectious Disease
- Critical Care Medicine
- Other

4. What is your current designation in the hospital? \*

*Mark only one oval.*

- Junior Resident
- Senior Resident/Registrar/ Associate
- Fellow/ Post graduate trainee
- Consultant
- Senior Consultant

5. Which State or Union Territory you are currently working? \*

---

Antiviral Agents

6. Which of the following antiviral agents do you use in severe COVID-19? \*

You can choose multiple options

*Check all that apply.*

- Remdesivir
- Ivermectin
- Convalescent Plasma
- Interferon
- Favipiravir
- I do not use any antiviral agent
- Others (please specify in comment section)

7. Comment

---

---

---

---

---

8. In which group of COVID-19 patients, do you use Remdesivir? \*

You can choose multiple options

*Check all that apply.*

- Moderate COVID-19
- Severe COVID-19
- Critical COVID-19
- Patients requiring oxygen to maintain Spo2 >90%
- Patient requiring Invasive mechanical ventilation
- All cases of COVID-19 (Irrespective of the severity)
- I do not use Remdesivir

9. For how much duration (days) do you use Remdesivir in severe COVID-19?

*Mark only one oval.*

- Five to 10 days depending on the severity
- Five days in all patients
- 10 days in all patients
- More than 10 days

10. In which group of COVID-19 patients, do you use Favipiravir? \*

You can choose multiple options

*Check all that apply.*

- Moderate COVID-19
- Severe COVID-19
- Critical COVID-19
- Patients requiring oxygen to maintain Spo2 >90%
- Patient requiring Invasive mechanical ventilation
- All cases of COVID-19 (Irrespective of the severity)
- I do not use Favipiravir

11. For how much duration (days) do you use Favipiravir in severe COVID-19?

*Mark only one oval.*

- Less than 7 days
- Seven to 14 days
- More than 14 days

12. In which group of COVID-19 patients, do you use Ivermectin? \*

You can choose multiple options

*Check all that apply.*

- Moderate COVID-19
- Severe COVID-19
- Critical COVID-19
- Patients requiring oxygen to maintain Spo2 >90%
- Patient requiring Invasive mechanical ventilation
- All cases of COVID-19 (Irrespective of the severity)
- I do not use Ivermectin

13. For how much duration (days) do you use Ivermectin for severe COVID-19?

*Mark only one oval.*

- Single dose
- 1-3 days
- More than 3 days

14. In which group of COVID-19 patients, do you use Interferon (subcutaneous or nebulisation) \*

You can choose multiple options

*Check all that apply.*

- Moderate COVID-19
- Severe COVID-19
- Critical COVID-19
- Patients requiring oxygen to maintain Spo2 >90%
- Patient requiring Invasive mechanical ventilation
- All cases of COVID-19 (Irrespective of the severity)
- I do not use Interferon

15. For how much duration (days) do you use Interferon (subcutaneous or nebulisation) for severe COVID-19?

*Mark only one oval.*

- Less than five days
- Five to ten days
- More than 10 days

16. In which group of COVID-19 patients, do you use Convalescent Plasma? \*

You can choose multiple options

*Check all that apply.*

- Moderate COVID-19
- Severe COVID-19
- Critical COVID-19
- Patients requiring oxygen to maintain Spo2 >90%
- Patient requiring Invasive mechanical ventilation
- All cases of COVID-19 (Irrespective of the severity)
- I do not use Convalescent Plasma

17. How many session (doses) of Convalescent plasma do you use in severe COVID-19?

*Mark only one oval.*

- One session
- Two session
- More than two session

Immunomodulators

18. Which of the following Immunomodulators do you use in severe COVID-19? \*

You can choose multiple options

*Check all that apply.*

- Corticosteroids
- Tocilizumab/Itolizumab
- Ulinastatin
- Sepsisvac
- Thymosin
- I do not use any Immunomodulator
- Others (please specify in comment section)

19. Comment

---

---

---

---

---

20. In which group of COVID-19 patients, do you use corticosteroids? \*

You can choose multiple options

*Check all that apply.*

- Moderate COVID-19
- Severe COVID-19
- Critical COVID-19
- Patients requiring oxygen to maintain Spo2 >90%
- Patients requiring invasive mechanical ventilation
- All cases of COVID-19 (Irrespective of the severity)
- I do not use corticosteroids



21. Which corticosteroid do you prefer in severe COVID-19?

*Mark only one oval.*

- Hydrocortisone
- Dexamethasone
- Methylprednisolone
- Prednisolone
- Class does not matter

22. Which intravenous corticosteroid dose you prefer (equivalent dose of dexamethasone phosphate) per day in severe COVID-19?

You can choose multiple options

*Check all that apply.*

- 8 mg (equal to 6 mg of IV dexamethasone)
- 9-16 mg
- >16 mg

23. What duration of corticosteroid use, do you prefer in severe COVID-19?

You can choose multiple options

*Check all that apply.*

- 5 days
- 5-10 days
- More than 10 days
- Extended duration (more than 10 days) based on clinical response and inflammatory biomarkers

24. In which group of COVID-19 patients, do you use Tocilizumab? \*

You can choose multiple options

*Check all that apply.*

- Moderate COVID-19
- Severe COVID-19
- Critical COVID-19
- Patients requiring oxygen to maintain Spo2 >90%
- Acute deterioration of clinical status (Worsening Hypoxemia)
- Patient requiring Invasive mechanical ventilation
- Interleukin(IL)-6 more than 5-10 times of normal
- I do not use Tocilizumab

25. How many doses of Tocilizumab (maximum 8 mg/kg/dose) do you use in severe COVID-19

*Mark only one oval.*

- One
- Two
- More than two

26. In which group of COVID-19 patients, do you use Itolizumab? \*

You can choose multiple options

*Check all that apply.*

- Moderate COVID-19
- Severe COVID-19
- Critical COVID-19
- Patients requiring oxygen to maintain Spo2 >90%
- Acute deterioration of clinical status (Worsening Hypoxemia)
- Patient requiring Invasive mechanical ventilation
- Interleukin(IL)-6 more than 5-10 times of normal
- I do not use Itolizumab

27. How many doses of Itolizumab do you use in severe COVID-19 ?

*Mark only one oval.*

- One
- Two
- More than two

28. In which group of COVID-19 patients, do you use Ulinastatin? \*

You can choose multiple options

*Check all that apply.*

- Moderate COVID-19
- Severe COVID-19
- Critical COVID-19
- Patients requiring oxygen to maintain Spo2 >90%
- Patient requiring invasive mechanical ventilation
- All patients of COVID-19 (irrespective of severity)
- I do not use Ulinastatin

29. In which group of COVID-19 patients, do you use Sepsivac? \*

You can choose multiple options

*Check all that apply.*

- Moderate COVID-19
- Severe COVID-19
- Critical COVID-19
- Patients requiring oxygen to maintain Spo2 >90%
- Patient requiring invasive mechanical ventilation
- All patients of COVID-19 (irrespective of severity)
- I do not use Sepsivac

30. In which group of COVID-19 patients, do you use Thymosin? \*

You can choose multiple options

*Check all that apply.*

- Moderate COVID-19
- Severe COVID-19
- Critical COVID-19
- Patients requiring oxygen to maintain Spo2 >90%
- Patient requiring invasive mechanical ventilation
- All patients of COVID-19 (irrespective of severity)
- I do not use Thymosin

### Adjuvant therapies

31. Which of the following adjuvant therapies do you use in severe COVID-19? \*

You can choose multiple options

*Check all that apply.*

- Antibiotics (Azithromycin or Doxycycline etc.)
- Vitamins (Vitamin C OR Vitamin D) and zinc
- Antithrombotics (Anticoagulants or Antiplatelets)
- Other (please specify in comment section)

32. Comments

---

33. In which group of COVID-19 patients, do you use empirical antibiotics? \*

You can choose multiple options

*Check all that apply.*

- Moderate COVID-19
- Severe COVID-19
- Critical COVID-19
- Only if there is rise inflammatory markers (e.g. procalcitonin) and clinical deterioration
- All patients of COVID-19 (irrespective of severity)
- I do not use antibiotics empirically

34. In which group of COVID-19 patients, do you use anticoagulants for thromboprophylaxis?

You can choose multiple options

*Check all that apply.*

- Moderate COVID-19
- Severe COVID-19
- Critical COVID-19
- If laboratory markers are raised (D-dimer etc.)
- All patients of COVID-19 (irrespective of severity)
- I do not use anticoagulants

35. In which group of COVID-19 patients, do you use prophylactic anti-platelets ? \*

You can choose multiple options

*Check all that apply.*

- Moderate COVID-19
- Severe COVID-19
- Critical COVID-19
- All patients of COVID-19 (irrespective of severity)
- I do not use anti-platelets

36. In which group of COVID-19 patients, do you use therapeutic Vitamins (Vitamin C OR Vitamin D)? \*

You can choose multiple options

*Check all that apply.*

- Moderate COVID-19
- Severe COVID-19
- Critical COVID-19
- Only if found deficiency on laboratory testing
- All patients of COVID-19 (irrespective of severity)
- I do not use Vitamins

---

This content is neither created nor endorsed by Google.

Google Forms
